# Supplementary material for: Phenylalanine Ammonia Lyase GmPAL1.1 Promotes Seed Vigor under High-Temperature and -Humidity Stress and Enhances Seed Germination under Salt and Drought Stress in Transgenic Arabidopsis
Source: MDPI journal article supplement (doi:10.3390/plants11233239), 2022-11-25
Supplement: s1 [file s1]

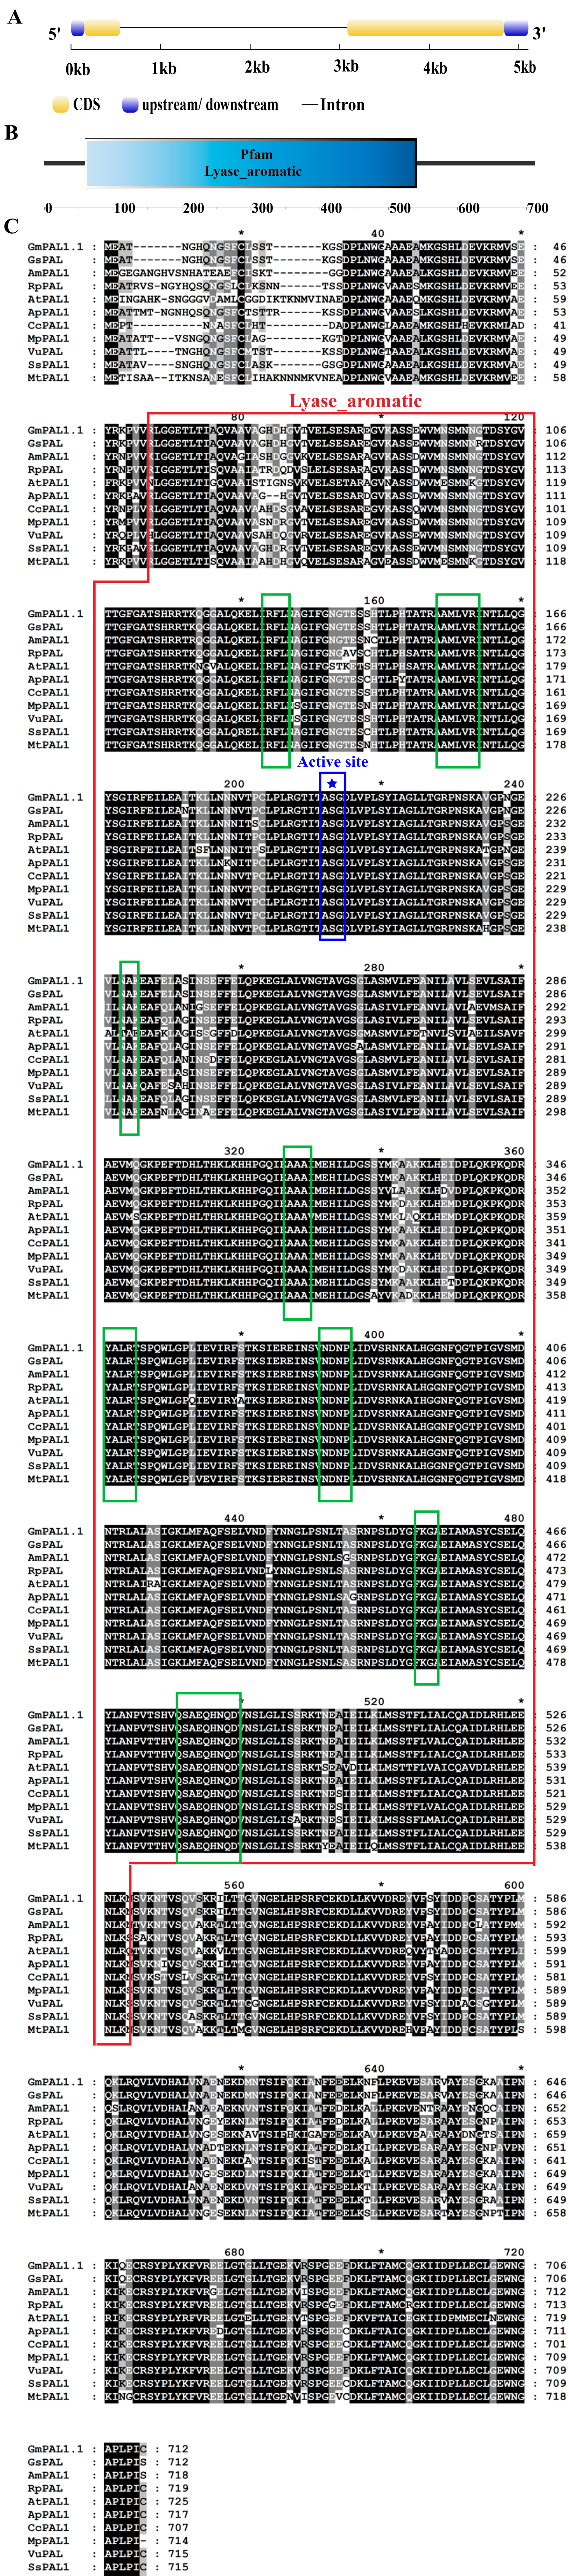

**Supplementary Figure S1.** Sequence analyses of the *GmPAL1.1* gene from the soybean cultivar Xiangdou No. 3. (A) Gene structure of *GmPAL1.1*. (B, C) Structure analysis of the GmPAL1.1 protein. The SSG triad motif and other conserved active sites were highlighted in blue and green. Gm, *Glycine max*; Gs, *Glycine soja*; Am, *Astragalus mongholicus*; Mt, *Medicago truncatula*; Rp, *Robinia pseudoacacia*; Ap, *Abrus precatorius*; Vu, *Vigna unguiculata*; Mp, *Mucuna pruriens*; Ss, *Spatholobus suberectus*; Cc, *Cajanus cajan*.
