# Supplementary material for: Phenylalanine Ammonia Lyase GmPAL1.1 Promotes Seed Vigor under High-Temperature and -Humidity Stress and Enhances Seed Germination under Salt and Drought Stress in Transgenic Arabidopsis
Source: MDPI journal article supplement (doi:10.3390/plants11233239), 2022-11-25
Supplement: s1 [file s1]

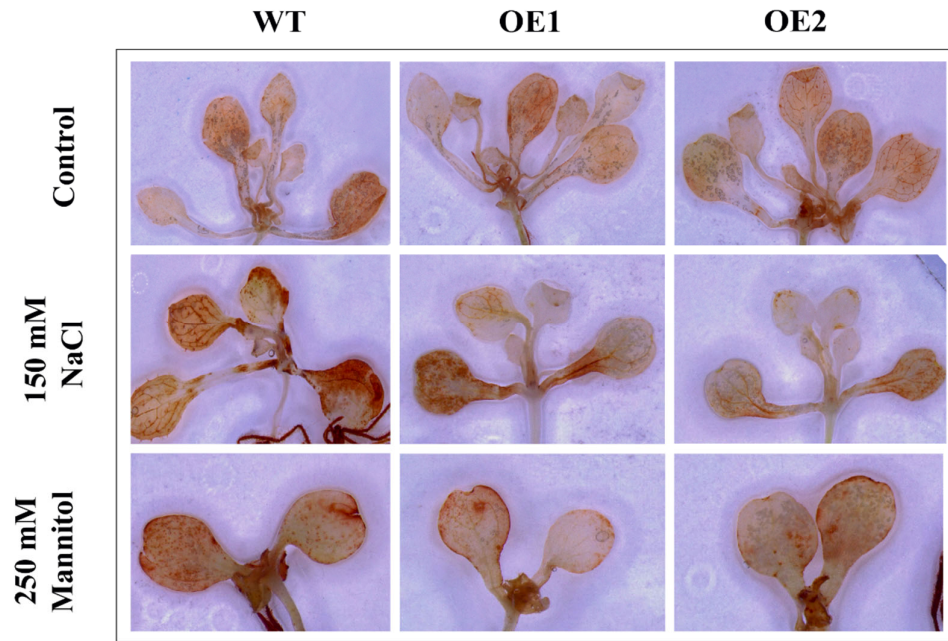

**Supplementary Figure S5.** DAB staining of 7-day-old *Arabidopsis* seedlings. Wild-type (WT) and transgenic (OE1, OE2) *Arabidopsis* seeds were exposed on 1/2 MS medium (control condition) or NaCl and Mannitol conditions for 7 d. The 7-day-old seedlings were used for DAB staining. Values are mean  $\pm$  SD of three biological replicates.
