# Supplementary material for: Phenylalanine Ammonia Lyase GmPAL1.1 Promotes Seed Vigor under High-Temperature and -Humidity Stress and Enhances Seed Germination under Salt and Drought Stress in Transgenic Arabidopsis
Source: Plants (Basel). 2022 Nov 25;11(23):3239. doi: 10.3390/plants11233239 (PMC9736545; doi:10.3390/plants11233239)
Supplement: Supplementary file 1 [file plants-11-03239-s001.zip › Supplementary Table S1.xlsx]

## Sheet: Supplementary Table S1
Supplementary Table S1. Sequences of primers used in this study
Name	Sequence (5'-3')	Function
GmPAL1.1-F	TATCTCTCTCTCTGTCTCTACAAAACTT	Gene cloning
GmPAL1.1-R	TCCGGCAAACTACTGAAATTC	Gene cloning
Pro-GmPAL1.1-F	TTCAAACATGACAGGCGCTA	Promotor cloning
Pro-GmPAL1.1-R	GGACAAGCAAAACGAACCAT	Promotor cloning
pBinGFP4-GmPAL1.1-F	ATTTACGAACGATAGGGTACCATGGAAGCAACTAATGGCC	Subcellular localization
pBinGFP4-GmPAL1.1-R	GCTCACCATGGATCCGTCGACACAGATTGGAAGAGGAGCT	Subcellular localization
pRI101-PAL1.1-F	TTGATACATATGCCCGTCGACATGGAAGCAACTAATGGCC	Transgenic
pRI101-PAL1.1-R	GCTCACCATGGATCCGGTACCACAGATTGGAAGAGGAGCT	Transgenic
pRI101- 35s-F	CAGTGAGCGCAACGCAATTA	Transgenic
pRI101-R	TAGGTCAGGGTGGTCACGAGG	Transgenic
qRT-GmPAL1.1-F	GTGAGTGGGTGATGAACAGCA	qRT-PCR expression analysis in soybean
qRT-GmPAL1.1-R	GCAGGGTGTGGCTTGATTC	qRT-PCR expression analysis in soybean
GmActin-F	CCTCAACCCAAAGGTCAACAG	qRT-PCR expression analysis in soybean
GmActin-R	GACCAGCGAGATCCAAACGAA	qRT-PCR expression analysis in soybean
qRT- AtTubulin -F	CTCAAGAGGTTCTCAGCAGTA	qRT-PCR expression analysis in Arabidopsis thaliana
qRT- AtTubulin -R	TCACCTTCTTCATCCGCAGTT	qRT-PCR expression analysis in Arabidopsis thaliana
