# Supplementary material for: Phenylalanine Ammonia Lyase GmPAL1.1 Promotes Seed Vigor under High-Temperature and -Humidity Stress and Enhances Seed Germination under Salt and Drought Stress in Transgenic Arabidopsis
Source: Plants (Basel). 2022 Nov 25;11(23):3239. doi: 10.3390/plants11233239 (PMC9736545; doi:10.3390/plants11233239)
Supplement: Supplementary file 1 [file plants-11-03239-s001.zip › Supplementary Table S2.xlsx]

## Sheet: Supplementary Table S2
Supplementary Table S2. Number of cis-elements in the promotor of GmPAL1.1
Motif name	Number of cis-elements	Function
ABRE relative element	8	cis-acting element of abscisic acid response
AC element	2	conserved elements of phenylpropanoid biosynthesis pathway
ARE	2	cis-acting regulatory element essential for the anaerobic induction
Box 4	11	part of a light responsive element
CAAT-box	27	common cis-acting element in promoter and enhancer regions
CCAAT-box	2	cis-acting regulatory element related to meristem expression
CGTCA-motif	2	cis-acting regulatory element involved in the MeJA-responsiveness
circadian	1	cis-acting regulatory element involved in circadian control
ERE	5	ethylene response element, ERE
GARE-motif	2	gibberellin-responsive element
G-Box	4	cis-acting regulatory element involved in light responsiveness
light responsive element	3	light responsive element
MSA-like	1	cis-acting element involved in cell cycle regulation
MYB	8	MYB binding site
MYC	2	MYC binding site
STRE	1	Stress Response Element (STRE) under heat stress.
TATA-box	85	core promoter element around -30 of transcription start
W box	2	WRKY binding site
WRE3	2	wound-inducing element WRE3
WUN-motif	1	wound-inducing element WUN-motif
